# Supplementary material
Source: publisher figshare collection journal article supplement (https://tandf.figshare.com/ndownloader/files/25898388)
Supplement: Supplementary file 1 [file 25898388]

| **Supplemental Table 2. Assessment of methodological quality of case series determined using the NHLBI tool** | | | | |
| --- | --- | --- | --- | --- |
| Criteria/Study | Bede  (2017) | Lee (2012) | Park (2012) | Tobin (2009) |
| Was the study question or objective clearly stated? | Yes | Yes | Yes | Yes |
| Was the study population clearly and fully described, including a case definition? | Yes | Yes | Yes | Yes |
| Were the cases consecutive? | Yes | Yes | Yes | Yes |
| Were the subjects comparable? | NR | NR | NR | NR |
| Was the exposure clearly described? | Yes | Yes | Yes | Yes |
| Were the outcome measures clearly defined, valid, reliable, and implemented consistently across all study participants? | NR | NR | NR | Yes |
| Was the length of follow-up adequate? | Yes | Yes | Yes | Yes |
| Were the statistical methods well described? | Yes | Yes | Yes | Yes |
| Were the results well described? | Yes | Yes | Yes | Yes |
| Overall quality | Fair | Fair | Fair | Fair |
| NA, not applicable; NR, not reported |  |  |  |  |
